# Supplementary material
Source: PubMed Central journal article supplement (PMC549502)

PDE2A GAF A

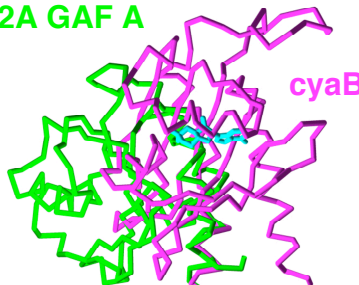

cyab2 GAF A

cyab2 GAF A

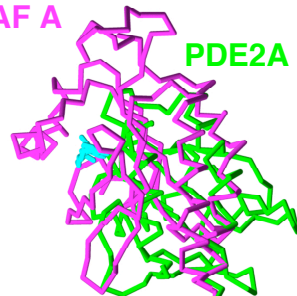

PDE2A GAF A

cyab2 GAF B

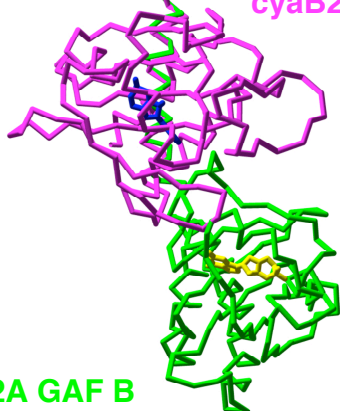

PDE2A GAF B

cyab2 GAF B

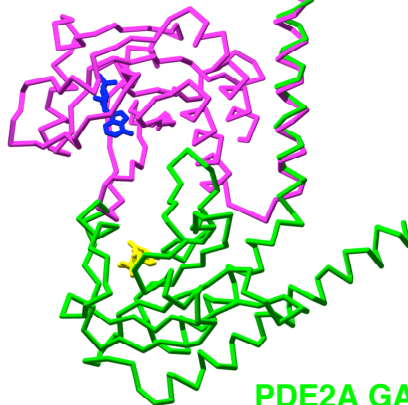

PDE2A GAF B

Supplement: pnas_102_8_3082__3.pdf [file pnas_102_8_3082__3.pdf]

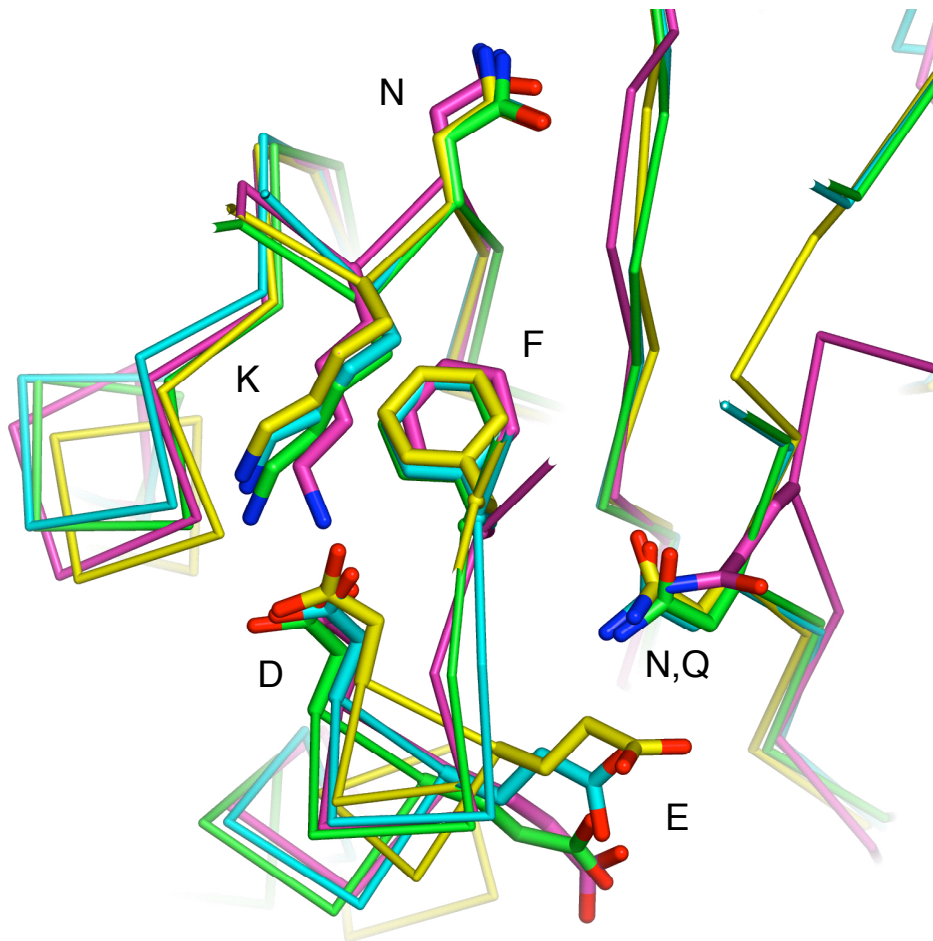

Supplement: pnas_102_8_3082__4.pdf [file pnas_102_8_3082__4.pdf]
